# Supplementary material for: Caring and Health of Close Family Members of Frail Older Persons Recently Discharged from Acute Hospital Care: A Comparative Cross-Sectional Study
Source: MDPI journal article supplement (doi:10.3390/nursrep14020069), 2024-04-10
Supplement: s1 [file s1]

## Supplementary File S1. Data coding of the response alternatives for the logistic regression analyses

| Variables                                                                              | Response alternatives                                                      | Dichotomised                                                                                 |
|----------------------------------------------------------------------------------------|----------------------------------------------------------------------------|----------------------------------------------------------------------------------------------|
| <b>DEPENDENT VARIABLES</b>                                                             |                                                                            |                                                                                              |
| <b>General health</b>                                                                  | 1 Very good<br>2 Rather good<br>3 Somewhat<br>4 Rather poor<br>5 Very poor | 0 = good health (score 1 and 2),<br>1 = poor health (score 3-5)                              |
| <b>HAD-A (anxiety)</b>                                                                 | Score 0-11                                                                 | 0 = no anxiety (score 0-6),<br>1 = anxiety (score $\geq 7$ )                                 |
| <b>HAD-D (depression)</b>                                                              | Score 0-11                                                                 | 0 = no depression (score 0-6),<br>1 = depression (score $\geq 7$ )                           |
| <b>INDEPENDENT VARIABLES</b>                                                           |                                                                            |                                                                                              |
| <b>Number of caregiving activities</b>                                                 | 13 different activities to choose from                                     | Mean 5 was used to dichotomise the group<br>0 = $\leq 5$ and 1 = $\geq 6$                    |
| <b>Number of hours caregiving per week</b>                                             | hours/week                                                                 | Mean 11.9 was used to dichotomise the group<br>0 = $\leq 12$ h/week and 1 = $\geq 13$ h/week |
| <b>Feeling responsible for the older person's wellbeing</b>                            | 1 Not at all<br>2 Low degree<br>3 Some degree<br>4 High degree             | 0 = Not at all<br>1 = High degree, Some degree, and Low degree                               |
| <b>Feeling responsible for the older person's getting sufficient formal assistance</b> | Same as above                                                              |                                                                                              |
| <b>Feeling powerless</b>                                                               | 1 Never<br>2 Seldom<br>3 Often<br>4 Very often                             | 0 = Seldom and Never<br>1 = Very often and Often                                             |
| <b>Feeling guilty</b>                                                                  | Same as above                                                              |                                                                                              |
| <b>Feeling of not helping enough</b>                                                   | Same as above                                                              |                                                                                              |
